# Supplementary material for: First report of environmental isolation of Cryptococcus spp. from Boyacá - Colombia
Source: Research Square preprint supplement (doi:10.21203/rs.3.rs-2350693/v2), 2023-02-14
Supplement: Supplementary file 1 [file 83a8542c2d67b306d62ff300.docx]

**Additional files**

**Additional file 1: Table S1.** Record of environmental variables for sampling avian feces belonging to the Tunja city

**Additional file 2. Table S2.** The environmental variables obtained in the sampling belonging to the Ricaurte Alto region
